# Supplementary material for: Expression of TILs and Patterns of Gene Expression from Paired Samples of Malignant Pleural Mesothelioma (MPM) Patients
Source: MDPI journal article supplement (doi:10.3390/cancers15143611), 2023-07-14
Supplement: s1 [file s1]

**Supplemental Table 1. VHIO-300. List of genes included in the targeted capture panel.**

|          |         |         |           |         |          |         |         |          |
|----------|---------|---------|-----------|---------|----------|---------|---------|----------|
| ABL1     | CBFB    | EIF1AX  | FOXL2     | IRS2    | MSH6     | PIK3R1  | ROS1    | TGFBR2   |
| ABL2     | CBL     | EP300   | FOXP1     | JAK1    | MTOR     | PIK3R2  | RPS6KA4 | TMEM127  |
| ACVR1B   | CCND1   | EPCAM   | FRS2      | JAK2    | MUTYH    | PIK3R3  | RPS6KB2 | TMPRSS2  |
| AKT1     | CCND2   | EPHA3   | FUBP1     | JAK3    | MYC      | PIM1    | RPTOR   | TNFAIP3  |
| AKT2     | CCND3   | EPHA5   | GABRA6    | JUN     | MYCL     | PLCG2   | RSPO2   | TNFRSF14 |
| AKT3     | CCNE1   | EPHA7   | GATA1     | KAT6A   | MYCL1    | PLK2    | RUNX1   | TOP1     |
| ALK      | CD274   | EPHB1   | GATA2     | KDM5A   | MYCN     | PMAIP1  | RUNX1T1 | TOP2A    |
| ALOX12B  | CD276   | ERBB2   | GATA3     | KDM5C   | MYD88    | PMS1    | RYBP    | TP53     |
| AMER1    | CD79A   | ERBB3   | GATA4     | KDM6A   | MYOD1    | PMS2    | SDHA    | TP63     |
| APC      | CD79B   | ERBB4   | GATA6     | KDR     | NBN      | PNRC1   | SDHAF2  | TRAF7    |
| AR       | CDC73   | ERCC2   | GID4      | KEAP1   | NCOR1    | POLD1   | SDHB    | TSC1     |
| ARAF     | CDH1    | ERCC3   | GLI1      | KEL     | NF1      | POLE    | SDHC    | TSC2     |
| ARFRP1   | CDK12   | ERCC4   | GNA11     | KIT     | NF2      | PPP2R1A | SDHD    | TSHR     |
| ARID1A   | CDK4    | ERCC5   | GNA13     | KLF4    | NFE2L2   | PPP2R2A | SETD2   | U2AF1    |
| ARID1B   | CDK6    | ERG     | GNAQ      | KLHL6   | NFKBIA   | PRDM1   | SF3B1   | VEGFA    |
| ARID2    | CDK8    | ERRF1   | GNAS      | KMT2A   | NKX2-1   | PREX2   | SH2D1A  | VHL      |
| ARID5B   | CDKN1A  | ESR1    | GPR124    | KMT2C   | NKX3-1   | PRKAR1A | SHH     | VTCN1    |
| ASXL1    | CDKN1B  | ETV1    | GREM1     | KMT2D   | NOTCH1   | PRKCI   | SHQ1    | WISP3    |
| ASXL2    | CDKN2A  | ETV6    | GRIN2A    | KRAS    | NOTCH2   | PRKDC   | SLIT2   | WT1      |
| ATM      | CDKN2B  | EZH2    | GRM3      | LATS1   | NOTCH3   | PRSS8   | SMAD2   | XIAP     |
| ATR      | CDKN2C  | FAM175A | GSK3B     | LATS2   | NOTCH4   | PTCH1   | SMAD3   | XPO1     |
| ATRX     | CEBPA   | FAM46C  | H3F3A     | LMO1    | NPM1     | PTEN    | SMAD4   | YAP1     |
| AURKA    | CHD2    | FANCA   | H3F3C     | LRP1B   | NRAS     | PTPN11  | SMARCA4 | YES1     |
| AURKB    | CHD4    | FANCC   | HGF       | LYN     | NSD1     | PTPRD   | SMARCB1 | ZBTB2    |
| AXIN1    | CHEK1   | FANCD2  | HIST1H1C  | LZTR1   | NTRK1    | PTPRS   | SMARCD1 | ZNF217   |
| AXIN2    | CHEK2   | FANCE   | HIST1H2BD | MAD2L2  | NTRK2    | PTPRT   | SMO     | ZNF703   |
| AXL      | CIC     | FANCF   | HIST1H3B  | MAGI2   | NTRK3    | QKI     | SNCAIP  |          |
| B2M      | CREBBP  | FANCG   | HNF1A     | MALT1   | NUP93    | RAC1    | SOCS1   |          |
| BAP1     | CRKL    | FANCL   | HRAS      | MAP2K1  | PAK1     | RAD50   | SOX10   |          |
| BARD1    | CRLF2   | FANCM   | HSD3B1    | MAP2K2  | PAK3     | RAD51   | SOX17   |          |
| BBC3     | CSF1R   | FAS     | HSP90AA1  | MAP2K4  | PAK7     | RAD51B  | SOX2    |          |
| BCL2     | CTCF    | FAT1    | ICOSLG    | MAP3K1  | PALB2    | RAD51C  | SOX9    |          |
| BCL2L1   | CTLA4   | FBXW7   | IDH1      | MAP3K13 | PARK2    | RAD51D  | SPEN    |          |
| BCL2L11  | CTNNA1  | FGF10   | IDH2      | MAP3K5  | PARP1    | RAD52   | SPOP    |          |
| BCL2L2   | CTNNB1  | FGF14   | IFNGR1    | MAPK1   | PAX5     | RAD54L  | SPTA1   |          |
| BCL6     | CUL3    | FGF19   | IGF1      | MAPK7   | PBRM1    | RAF1    | SRC     |          |
| BCOR     | CYLD    | FGF23   | IGF1R     | MAX     | PDCD1    | RANBP2  | STAG2   |          |
| BCORL1   | DAXX    | FGF3    | IGF2      | MCL1    | PDCD1LG2 | RARA    | STAT3   |          |
| BLM      | DCUN1D1 | FGF4    | IKBKE     | MDC1    | PDGFRA   | RASA1   | STAT4   |          |
| BMPR1A   | DDR2    | FGF6    | IKZF1     | MDM2    | PDGFRB   | RB1     | STK11   |          |
| BRAF     | DICER1  | FGFR1   | IL10      | MDM4    | PDK1     | RBM10   | STK40   |          |
| BRCA1    | DIS3    | FGFR2   | IL7R      | MED12   | PDPK1    | RECQL4  | SUFU    |          |
| BRCA2    | DNMT1   | FGFR3   | INHBA     | MEF2B   | PHOX2B   | REL     | SUZ12   |          |
| BRD4     | DNMT3A  | FGFR4   | INPP4A    | MEN1    | PIK3C2B  | RET     | SYK     |          |
| BRIP1    | DNMT3B  | FH      | INPP4B    | MET     | PIK3C2G  | RFWD2   | TAF1    |          |
| BTG1     | DOT1L   | FLCN    | INSR      | MITF    | PIK3C3   | RHEB    | TBX3    |          |
| BTK      | E2F3    | FLT1    | IRAK4     | MLH1    | PIK3CA   | RHOA    | TERT    |          |
| C11ORF30 | EED     | FLT3    | IRF2      | MPL     | PIK3CB   | RICTOR  | TET1    |          |
| CARD11   | EGFL7   | FLT4    | IRF4      | MRE11A  | PIK3CD   | RIT1    | TET2    |          |
| CASP8    | EGFR    | FOXA1   | IRS1      | MSH2    | PIK3CG   | RNF43   | TGFBR1  |          |
