# Supplementary material for: Expression of TILs and Patterns of Gene Expression from Paired Samples of Malignant Pleural Mesothelioma (MPM) Patients
Source: MDPI journal article supplement (doi:10.3390/cancers15143611), 2023-07-14
Supplement: s1 [file s1]

Supplementary Table 2: systemic treatments for each patient

| Nº patient | 1 <sup>st</sup> line | ORR | PFI (m) | 2 <sup>nd</sup> line | ORR | PFI (m) | 3 <sup>rd</sup> line | ORR | PFI (m) | 4 <sup>rd</sup> line |
|------------|----------------------|-----|---------|----------------------|-----|---------|----------------------|-----|---------|----------------------|
| 1          | None                 |     |         |                      |     |         |                      |     |         |                      |
| 2          | CDDP-pem             | PR  | 6       | *Anetumab            | PR  | 8       |                      |     |         |                      |
| 3          | CDDP-pem-Virus       | PR  | 5       | *Carbopem            | SD  | 6       | Nivo+ipi             | SD  | 4m      |                      |
| 4          | CDDP-pem             | PR  | 10      | *CDDP-pem            | SD  | 4       |                      |     |         |                      |
| 5          | CDDP-pem-Virus       | SD  | 12      | *CDDP-pem            | PR  | 5       | antiPD1              | PD  |         |                      |
| 6          | None                 |     |         |                      |     |         |                      |     |         |                      |
| 7          | None                 |     |         |                      |     |         |                      |     |         |                      |
| 8          | CDDP-pem             | SD  | NR      |                      |     |         |                      |     |         |                      |
| 9          | CDDP-pem-beva        | PR  | 8       | Carbopem             | PD  | 0       | Pembro               | PR  | 6m      | *LAG3                |
| 10         | CDDP-pem             | PD  |         | Vinorelbine          | PR  | 10      | *Gemcitabine         | PD  |         |                      |

(\*) means the time of second biopsy (performed before to initiate the therapy). Pem: pemetrexed; beva: bevacizumab; ORR: overall response rate, PR: partial response, SD: stable disease, PD: progressive disease, PFI: progression free interval, m: months, NR: not reached
